# Supplementary material for: Horse Racing as a Model to Study the Relationship between Air Pollutants and Physical Performance
Source: MDPI journal article supplement (doi:10.3390/ani12091139), 2022-04-28
Supplement: s1 [file s1]

### Supplementary Materials

**Table S1.** Race speed of the 1,000; 1,100 and 1,200 meter races. In addition, the mean concentrations of pollutants measured in the ambient air six hours before the start of the "Handicap" type races are shown. The p value shown corresponds to the ANOVA or Kruskal-Wallis test, respectively. The values are expressed as mean±standard deviation and as median (IQR). The n for O<sub>3</sub> were 31, 138, 30 respectively, while for the total races it was 169. "a" is different from the 1,000 meter group.

|                                            | 1,000 m      | 1,100 m                   | 1,200 m      | p-value/<br>Eta squared |
|--------------------------------------------|--------------|---------------------------|--------------|-------------------------|
| <b>Races (n/%)</b>                         | 34/15.88     | 148/69.16                 | 32/14.95     |                         |
| <b>Speed (km/h)</b>                        | 62.05±0.90   | 62.42±0.94                | 62.41±0.55   | 0.09                    |
|                                            | 61.95 (1.56) | 62.47(1.23)               | 62.50(0.98)  |                         |
| <b>PM<sub>10</sub> (µg/m<sup>3</sup>)</b>  | 99.22±37.91  | 88.44±28.83               | 90.18±35.89  | 0.20                    |
|                                            | 88.25(57.22) | 87.50(45.21)              | 82.58(51.21) |                         |
| <b>PM<sub>2.5</sub> (µg/m<sup>3</sup>)</b> | 29.33±12.44  | 23.73±11.67               | 26.06±15.12  |                         |
|                                            | 23.90(20.90) | 21.32(16.00) <sup>a</sup> | 20.71(7.96)  | 0.03/0.024              |
| <b>Ozone (ppb)</b>                         | 26.47±11.22  | 24.73±13.40               | 29.09±10.26  |                         |
|                                            | 29.00(20.53) | 27.56(24.43)              | 32.43(16.03) | 0.17                    |
| <b>CO (ppm)</b>                            | 0.50±0.38    | 0.44±0.27                 | 0.40±0.28    |                         |
|                                            | 0.40(0.50)   | 0.36(0.40)                | 0.24(0.26)   | 0.08                    |
| <b>NO<sub>2</sub> (ppb)</b>                | 30.11±22.09  | 26.04±20.80               | 22.44±22.88  |                         |
|                                            | 29.00(40.43) | 18.52(37.92)              | 8.86(28.96)  | 0.49                    |
| <b>NO (ppb)</b>                            | 22.32±43.07  | 14.96±23.05               | 14.91±29.52  |                         |
|                                            | 7.40(18.20)  | 5.14(19.31)               | 2.28(16.11)  | 0.58                    |
| <b>SO<sub>2</sub> (ppb)</b>                | 3.20±1.81    | 2.58±0.85                 | 2.92±1.86    |                         |
|                                            | 2.95(2.60)   | 2.39(1.02)                | 2.06(1.24)   | 0.64                    |

**Table S2.** Race speed of the 1,000; 1,100 and 1,200 meter races. In addition, the mean concentrations of pollutants measured in the ambient air six hours before the start of the "Conditional" type races are shown. The p-value shown corresponds to the ANOVA or Kruskal-Wallis test respectively. Values are expressed as mean±standard deviation and median (IQR). The n for O<sub>3</sub> were 19, 51, 23 respectively, while for the total races it was 93. "c" is different from the 1,200 meter group.

|                                            | 1,000 m                   | 1,100 m                   | 1,200 m       | p-value/<br>Eta squared |
|--------------------------------------------|---------------------------|---------------------------|---------------|-------------------------|
| <b>Races (n/%)</b>                         | <b>17/17.89</b>           | <b>55/57.89</b>           | 23/24.21      |                         |
| <b>Speed (km/h)</b>                        | 62.27±1.33                | 62.15±0.84                | 62.48±0.64    | 0.34                    |
|                                            | 61.62(2.41)               | 62.2(1.36)                | 62.39(0.89)   |                         |
| <b>PM<sub>10</sub> (µg/m<sup>3</sup>)</b>  | 82.25±26.14               | 86.58±26.88               | 113.20±36.4   | 0.0036/0.10             |
|                                            | 73.80(24.25) <sup>c</sup> | 84.00(28.33) <sup>c</sup> | 114.30(67.17) |                         |
| <b>PM<sub>2.5</sub> (µg/m<sup>3</sup>)</b> | 29.01±13.09               | 24.56±11.48               | 40.61±18.28   | 0.0008/0.13             |
|                                            | 25.30(14.45)              | 21.58(12.17) <sup>c</sup> | 44.50(34.84)  |                         |
| <b>Ozone (pub)</b>                         | 25.42±13.59               | 32.4±12.25                | 21.62±12.32   | 0.0063/0.092            |
|                                            | 27.70(24.55)              | 34.68(13.88) <sup>c</sup> | 21.47(22.24)  |                         |
| <b>CO (ppm)</b>                            | 0.63±0.35                 | 0.42±0.27                 | 0.87±0.63     | 0.038/0.097             |
|                                            | 0.70(0.50)                | 0.31(0.21) <sup>c</sup>   | 0.70(1.23)    |                         |
| <b>NO<sub>2</sub> (ppb)</b>                | 31.41±23.16               | 21.32±17.88               | 43.97±31.53   | 0.010/0.076             |
|                                            | 35.30(30.80)              | 13.01(19.36) <sup>c</sup> | 37.2(64.95)   |                         |
| <b>NO (ppb)</b>                            | 26.35±30.05               | 21.05±35.17               | 67.86±62.77   | 0.0041/0.098            |
|                                            | 17.00(33.90)              | 4.87(24.49) <sup>c</sup>  | 54.54(106.34) |                         |
| <b>SO<sub>2</sub> (ppb)</b>                | 3.10±0.95                 | 2.84±1.36                 | 4.04±2.06     | 0.086                   |
|                                            | 34.00(1.80)               | 2.44(1.16)                | 4.31(3.26)    |                         |

**Table S3.** Dataset of handicap races.

| Number | Distance | Type of race | Track<br>Condition | Speed | PM10  | PM2.5 | O3   | CO  | NO2  | NO    | SO2 |
|--------|----------|--------------|--------------------|-------|-------|-------|------|-----|------|-------|-----|
| 173    | 1000     | Handicap     | Good               | 63.62 | 70.9  | 18.4  | 39.6 | 0.2 | 6.0  | 1.0   | 2.1 |
| 182    | 1000     | Handicap     | Good               | 61.46 | 64.4  | 26.7  | 21.0 | 0.4 | 17.8 | 28.1  | 1.8 |
| 191    | 1000     | Handicap     | Good               | 62.60 | 58.3  | 21.2  | 37.3 | 0.2 | 7.5  | 1.8   | 1.4 |
| 193    | 1000     | Handicap     | Good               | 62.98 | 59.9  | 17.8  | 36.7 | 0.2 | 6.8  | 1.5   | 1.4 |
| 194    | 1000     | Handicap     | Good               | 62.86 | 59.9  | 17.8  | 36.7 | 0.2 | 6.8  | 1.5   | 1.4 |
| 195    | 1000     | Handicap     | Good               | 61.89 | 56.0  | 17.9  | 34.0 | 0.2 | 6.4  | 1.3   | 1.5 |
| 196    | 1000     | Handicap     | Good               | 63.21 | 56.0  | 17.9  | 34.0 | 0.2 | 6.4  | 1.3   | 1.5 |
| 197    | 1000     | Handicap     | Good               | 62.38 | 55.8  | 17.8  | 29.0 | 0.2 | 7.0  | 1.2   | 1.6 |
| 198    | 1000     | Handicap     | Good               | 63.06 | 55.8  | 17.8  | 29.0 | 0.2 | 7.0  | 1.2   | 1.6 |
| 201    | 1000     | Handicap     | Good               | 62.26 | 97.8  | 32.3  | 17.2 | 0.6 | 27.8 | 38.1  | 1.9 |
| 212    | 1000     | Handicap     | Good               | 62.60 | 88.7  | 19.3  | 35.2 | 0.3 | 8.1  | 1.2   | 2.0 |
| 213    | 1000     | Handicap     | Good               | 64.00 | 91.3  | 19.7  | 34.3 | 0.3 | 8.3  | 1.0   | 2.0 |
| 214    | 1000     | Handicap     | Good               | 61.96 | 91.3  | 19.7  | 34.3 | 0.3 | 8.3  | 1.0   | 2.0 |
| 216    | 1000     | Handicap     | Good               | 62.84 | 93.6  | 20.0  | 31.7 | 0.3 | 8.7  | 1.0   | 2.0 |
| 217    | 1000     | Handicap     | Good               | 62.37 | 86.5  | 19.9  | 28.9 | 0.3 | 8.9  | 1.0   | 2.0 |
| 237    | 1000     | Handicap     | Good               | 61.38 | 165.4 | 59.9  | 8.4  | 2.0 | 81.9 | 178.1 | 7.7 |
| 249    | 1000     | Handicap     | Good               | 61.92 | 134.7 | 41.7  | 40.1 | 0.7 | 62.7 | 7.4   | 5.0 |
| 250    | 1000     | Handicap     | Good               | 61.29 | 134.7 | 41.7  | 40.1 | 0.7 | 62.7 | 7.4   | 5.0 |
| 252    | 1000     | Handicap     | Good               | 61.59 | 152.3 | 40.2  | 34.9 | 0.7 | 57.7 | 6.7   | 4.7 |
| 253    | 1000     | Handicap     | Good               | 61.07 | 152.3 | 40.2  | 34.9 | 0.7 | 57.7 | 6.7   | 4.7 |
| 254    | 1000     | Handicap     | Good               | 61.30 | 183.1 | 42.8  | 26.8 | 0.8 | 57.5 | 8.9   | 4.4 |
| 255    | 1000     | Handicap     | Good               | 60.95 | 183.1 | 42.8  | 26.8 | 0.8 | 57.5 | 8.9   | 4.4 |
| 266    | 1000     | Handicap     | Good               | 62.41 | 74.3  | 28.9  | 11.1 | 0.7 | 45.2 | 16.6  | 2.9 |

|     |      |          |      |       |       |      |      |     |      |       |     |
|-----|------|----------|------|-------|-------|------|------|-----|------|-------|-----|
| 293 | 1000 | Handicap | Good | 61.00 | 123.8 | 49.6 | 4.7  | 1.5 | 54.0 | 178.6 | 5.3 |
| 301 | 1000 | Handicap | Good | 61.94 | 86.5  | 27.1 | 15.5 | 0.5 | 46.5 | 33.3  | 3.3 |
| 305 | 1000 | Handicap | Good | 62.24 | 87.8  | 21.4 | 14.3 | 0.4 | 37.7 | 11.5  | 3.0 |
| 306 | 1000 | Handicap | Good | 60.93 | 87.8  | 21.4 | 14.3 | 0.4 | 37.7 | 11.5  | 3.0 |
| 307 | 1000 | Handicap | Good | 61.20 | 87.8  | 21.4 | 14.3 | 0.4 | 37.7 | 11.5  | 3.0 |
| 308 | 1000 | Handicap | Good | 60.93 | 108.8 | 23.9 | 11.6 | 0.4 | 37.3 | 12.0  | 3.0 |
| 309 | 1000 | Handicap | Good | 61.30 | 108.8 | 23.9 | 11.6 | 0.4 | 37.3 | 12.0  | 3.0 |
| 322 | 1000 | Handicap | Good | 62.82 | 84.3  | 29.7 | 42.6 | 0.5 | 30.4 | 3.9   | 3.2 |
| 329 | 1000 | Handicap | Good | 60.60 | 106.0 | 41.4 |      | 0.1 | 22.4 | 39.1  | 6.6 |
| 339 | 1000 | Handicap | Good | 61.13 | 154.8 | 60.5 |      | 0.6 | 29.8 | 81.1  | 8.2 |
| 577 | 1000 | Handicap | Good | 63.58 | 71.1  | 34.5 | 16.0 | 0.9 | 28.2 | 41.6  | 2.2 |
| 140 | 1100 | Handicap | Good | 61.04 | 102.0 | 15.5 | 41.1 | 0.2 | 6.0  | 1.0   | 2.1 |
| 1   | 1100 | Handicap | Good | 63.01 | 89.8  | 31.4 | 27.4 | 0.4 | 18.9 | 14.8  | 2.4 |
| 10  | 1100 | Handicap | Good | 63.15 | 74.7  | 22.3 | 45.4 | 0.2 | 6.3  | 1.0   | 2.6 |
| 11  | 1100 | Handicap | Good | 64.83 | 76.9  | 20.6 | 44.8 | 0.2 | 6.4  | 1.0   | 2.8 |
| 14  | 1100 | Handicap | Good | 62.88 | 80.0  | 20.3 | 42.5 | 0.2 | 6.9  | 1.0   | 2.8 |
| 15  | 1100 | Handicap | Good | 63.06 | 79.3  | 20.3 | 38.6 | 0.2 | 7.8  | 1.0   | 2.7 |
| 16  | 1100 | Handicap | Good | 63.19 | 79.3  | 20.3 | 38.6 | 0.2 | 7.8  | 1.0   | 2.7 |
| 17  | 1100 | Handicap | Good | 62.93 | 79.3  | 20.3 | 38.6 | 0.2 | 7.8  | 1.0   | 2.7 |
| 18  | 1100 | Handicap | Good | 61.85 | 43.7  | 13.6 | 27.3 | 0.3 | 7.2  | 2.4   | 1.7 |
| 24  | 1100 | Handicap | Good | 62.82 | 64.8  | 12.1 | 34.8 | 0.3 | 6.0  | 1.3   | 1.8 |
| 29  | 1100 | Handicap | Good | 63.33 | 95.4  | 11.8 | 32.6 | 0.3 | 5.4  | 1.1   | 1.9 |
| 30  | 1100 | Handicap | Good | 62.32 | 109.2 | 12.1 | 28.9 | 0.2 | 5.5  | 1.2   | 1.9 |
| 31  | 1100 | Handicap | Good | 62.35 | 109.2 | 12.1 | 28.9 | 0.2 | 5.5  | 1.2   | 1.9 |
| 32  | 1100 | Handicap | Good | 62.88 | 119.8 | 12.7 | 24.9 | 0.2 | 6.0  | 1.4   | 1.9 |
| 33  | 1100 | Handicap | Good | 63.21 | 119.8 | 12.7 | 24.9 | 0.2 | 6.0  | 1.4   | 1.9 |
| 34  | 1100 | Handicap | Good | 62.71 | 119.8 | 12.7 | 24.9 | 0.2 | 6.0  | 1.4   | 1.9 |
| 35  | 1100 | Handicap | Good | 63.41 | 119.5 | 12.4 | 21.2 | 0.3 | 6.9  | 1.5   | 1.9 |

|     |      |          |      |       |       |      |      |     |      |      |     |
|-----|------|----------|------|-------|-------|------|------|-----|------|------|-----|
| 36  | 1100 | Handicap | Good | 62.18 | 85.3  | 24.3 | 29.6 | 0.4 | 17.4 | 11.3 | 2.1 |
| 47  | 1100 | Handicap | Good | 63.07 | 104.4 | 24.3 | 47.0 | 0.3 | 8.3  | 1.1  | 1.9 |
| 48  | 1100 | Handicap | Good | 63.61 | 104.2 | 24.1 | 43.6 | 0.3 | 8.1  | 1.0  | 2.0 |
| 50  | 1100 | Handicap | Good | 62.76 | 102.2 | 24.2 | 39.0 | 0.3 | 8.3  | 1.0  | 2.0 |
| 51  | 1100 | Handicap | Good | 62.43 | 102.2 | 24.2 | 39.0 | 0.3 | 8.3  | 1.0  | 2.0 |
| 52  | 1100 | Handicap | Good | 62.59 | 102.2 | 24.2 | 39.0 | 0.3 | 8.3  | 1.0  | 2.0 |
| 53  | 1100 | Handicap | Good | 63.32 | 94.6  | 23.2 | 34.7 | 0.3 | 8.7  | 1.0  | 1.9 |
| 54  | 1100 | Handicap | Good | 63.53 | 94.6  | 23.2 | 34.7 | 0.3 | 8.7  | 1.0  | 1.9 |
| 55  | 1100 | Handicap | Good | 62.09 | 65.7  | 16.9 | 18.2 | 0.2 | 10.2 | 7.0  | 2.0 |
| 65  | 1100 | Handicap | Good | 63.73 | 62.5  | 14.7 | 31.1 | 0.2 | 5.4  | 1.0  | 2.1 |
| 67  | 1100 | Handicap | Good | 62.08 | 62.9  | 16.0 | 30.1 | 0.2 | 5.8  | 1.0  | 2.2 |
| 68  | 1100 | Handicap | Good | 63.42 | 62.9  | 16.0 | 30.1 | 0.2 | 5.8  | 1.0  | 2.2 |
| 69  | 1100 | Handicap | Good | 62.57 | 62.9  | 16.0 | 30.1 | 0.2 | 5.8  | 1.0  | 2.2 |
| 70  | 1100 | Handicap | Good | 63.16 | 62.3  | 16.6 | 27.7 | 0.2 | 6.5  | 1.0  | 2.2 |
| 71  | 1100 | Handicap | Good | 62.95 | 62.3  | 16.6 | 27.7 | 0.2 | 6.5  | 1.0  | 2.2 |
| 72  | 1100 | Handicap | Good | 63.54 | 61.3  | 16.6 | 24.3 | 0.2 | 7.3  | 1.0  | 2.2 |
| 91  | 1100 | Handicap | Good | 62.02 | 96.5  | 23.3 | 24.9 | 0.5 | 19.9 | 20.6 | 3.3 |
| 101 | 1100 | Handicap | Good | 62.11 | 81.8  | 15.8 | 39.8 | 0.2 | 6.7  | 1.0  | 2.6 |
| 103 | 1100 | Handicap | Good | 64.16 | 82.5  | 15.4 | 37.5 | 0.2 | 6.7  | 1.0  | 2.5 |
| 104 | 1100 | Handicap | Good | 63.55 | 82.5  | 15.4 | 37.5 | 0.2 | 6.7  | 1.0  | 2.5 |
| 105 | 1100 | Handicap | Good | 63.81 | 82.7  | 16.3 | 34.3 | 0.2 | 7.0  | 1.0  | 2.4 |
| 106 | 1100 | Handicap | Good | 62.79 | 82.7  | 16.3 | 34.3 | 0.2 | 7.0  | 1.0  | 2.4 |
| 107 | 1100 | Handicap | Good | 62.42 | 82.7  | 16.3 | 34.3 | 0.2 | 7.0  | 1.0  | 2.4 |
| 108 | 1100 | Handicap | Good | 62.43 | 76.1  | 14.8 | 30.6 | 0.2 | 7.3  | 1.0  | 2.3 |
| 109 | 1100 | Handicap | Good | 63.46 | 76.1  | 14.8 | 30.6 | 0.2 | 7.3  | 1.0  | 2.3 |
| 110 | 1100 | Handicap | Good | 61.53 | 62.1  | 17.6 | 21.6 | 0.4 | 15.7 | 18.7 | 2.1 |
| 121 | 1100 | Handicap | Good | 63.50 | 54.5  | 9.9  | 35.1 | 0.2 | 5.5  | 1.0  | 2.0 |
| 122 | 1100 | Handicap | Good | 62.97 | 53.8  | 9.0  | 32.0 | 0.2 | 5.4  | 1.0  | 2.0 |

|     |      |          |      |       |       |      |      |     |      |      |     |
|-----|------|----------|------|-------|-------|------|------|-----|------|------|-----|
| 123 | 1100 | Handicap | Good | 63.28 | 53.8  | 9.0  | 32.0 | 0.2 | 5.4  | 1.0  | 2.0 |
| 124 | 1100 | Handicap | Good | 62.88 | 51.5  | 8.0  | 27.8 | 0.2 | 5.6  | 1.0  | 2.0 |
| 125 | 1100 | Handicap | Good | 63.71 | 51.5  | 8.0  | 27.8 | 0.2 | 5.6  | 1.0  | 2.0 |
| 126 | 1100 | Handicap | Good | 62.39 | 51.5  | 8.0  | 27.8 | 0.2 | 5.6  | 1.0  | 2.0 |
| 127 | 1100 | Handicap | Good | 62.93 | 47.9  | 7.7  | 23.6 | 0.2 | 6.0  | 1.0  | 2.0 |
| 128 | 1100 | Handicap | Good | 60.86 | 99.1  | 26.1 | 27.3 | 0.7 | 33.9 | 40.1 | 3.3 |
| 138 | 1100 | Handicap | Good | 63.09 | 98.0  | 15.6 | 44.4 | 0.2 | 6.2  | 1.0  | 2.2 |
| 139 | 1100 | Handicap | Good | 63.49 | 98.0  | 15.6 | 44.4 | 0.2 | 6.2  | 1.0  | 2.2 |
| 141 | 1100 | Handicap | Good | 61.99 | 102.0 | 15.5 | 41.1 | 0.2 | 6.0  | 1.0  | 2.1 |
| 143 | 1100 | Handicap | Good | 61.87 | 114.2 | 20.2 | 38.1 | 0.2 | 6.4  | 1.0  | 2.0 |
| 144 | 1100 | Handicap | Good | 61.42 | 119.3 | 24.4 | 35.9 | 0.2 | 7.2  | 1.0  | 2.0 |
| 146 | 1100 | Handicap | Good | 60.89 | 131.8 | 41.1 | 30.4 | 0.9 | 44.2 | 53.7 | 3.7 |
| 155 | 1100 | Handicap | Good | 62.14 | 83.8  | 22.1 | 55.7 | 0.3 | 10.2 | 1.3  | 3.0 |
| 156 | 1100 | Handicap | Good | 61.22 | 81.7  | 17.1 | 52.2 | 0.3 | 7.7  | 1.0  | 3.0 |
| 157 | 1100 | Handicap | Good | 63.73 | 81.7  | 17.1 | 52.2 | 0.3 | 7.7  | 1.0  | 3.0 |
| 158 | 1100 | Handicap | Good | 61.18 | 92.6  | 13.5 | 48.4 | 0.3 | 7.9  | 1.0  | 3.0 |
| 160 | 1100 | Handicap | Good | 61.26 | 98.8  | 14.3 | 43.5 | 0.2 | 8.7  | 1.0  | 3.2 |
| 161 | 1100 | Handicap | Good | 62.21 | 98.8  | 14.3 | 43.5 | 0.2 | 8.7  | 1.0  | 3.2 |
| 162 | 1100 | Handicap | Good | 60.88 | 108.2 | 16.4 | 38.9 | 0.3 | 10.1 | 1.0  | 3.2 |
| 163 | 1100 | Handicap | Good | 60.95 | 108.2 | 16.4 | 38.9 | 0.3 | 10.1 | 1.0  | 3.2 |
| 164 | 1100 | Handicap | Good | 61.24 | 82.9  | 24.4 | 25.0 | 0.3 | 15.5 | 12.2 | 2.5 |
| 168 | 1100 | Handicap | Good | 62.97 | 72.6  | 19.4 | 35.6 | 0.2 | 9.1  | 2.6  | 2.4 |
| 175 | 1100 | Handicap | Good | 63.83 | 70.1  | 18.8 | 38.9 | 0.2 | 5.3  | 1.0  | 2.1 |
| 265 | 1100 | Handicap | Good | 62.17 | 75.8  | 27.3 | 12.0 | 0.7 | 41.6 | 19.8 | 3.9 |
| 267 | 1100 | Handicap | Good | 61.62 | 74.3  | 28.9 | 11.1 | 0.7 | 45.2 | 16.6 | 2.9 |
| 268 | 1100 | Handicap | Good | 63.14 | 81.1  | 29.3 | 10.8 | 0.7 | 47.1 | 16.8 | 2.1 |
| 269 | 1100 | Handicap | Good | 63.06 | 81.1  | 29.3 | 10.8 | 0.7 | 47.1 | 16.8 | 2.1 |
| 270 | 1100 | Handicap | Good | 62.30 | 81.1  | 29.3 | 10.8 | 0.7 | 47.1 | 16.8 | 2.1 |

|     |      |          |      |       |       |      |      |     |      |      |     |
|-----|------|----------|------|-------|-------|------|------|-----|------|------|-----|
| 271 | 1100 | Handicap | Good | 62.56 | 81.3  | 28.7 | 9.9  | 0.8 | 46.9 | 17.9 | 1.4 |
| 272 | 1100 | Handicap | Good | 62.65 | 81.3  | 28.7 | 9.9  | 0.8 | 46.9 | 17.9 | 1.4 |
| 273 | 1100 | Handicap | Good | 62.41 | 80.4  | 28.4 | 9.4  | 0.9 | 45.0 | 33.6 | 1.9 |
| 274 | 1100 | Handicap | Good | 60.53 | 126.4 | 48.3 |      | 1.2 | 49.3 | 98.0 | 4.6 |
| 284 | 1100 | Handicap | Good | 62.64 | 116.6 | 41.6 |      | 0.6 | 49.4 | 22.7 | 3.6 |
| 285 | 1100 | Handicap | Good | 61.03 | 116.6 | 41.6 |      | 0.6 | 49.4 | 22.7 | 3.6 |
| 286 | 1100 | Handicap | Good | 64.80 | 119.6 | 38.7 |      | 0.6 | 47.6 | 13.7 | 3.4 |
| 287 | 1100 | Handicap | Good | 63.15 | 119.6 | 38.7 |      | 0.6 | 47.6 | 13.7 | 3.4 |
| 288 | 1100 | Handicap | Good | 62.06 | 119.6 | 38.7 |      | 0.6 | 47.6 | 13.7 | 3.4 |
| 289 | 1100 | Handicap | Good | 61.89 | 142.2 | 38.7 |      | 0.6 | 46.7 | 20.1 | 3.4 |
| 290 | 1100 | Handicap | Good | 60.81 | 142.2 | 38.7 |      | 0.6 | 46.7 | 20.1 | 3.4 |
| 291 | 1100 | Handicap | Good | 61.07 | 170.6 | 40.6 |      | 0.7 | 48.0 | 29.4 | 3.4 |
| 292 | 1100 | Handicap | Good | 60.71 | 170.6 | 40.6 |      | 0.7 | 48.0 | 29.4 | 3.4 |
| 311 | 1100 | Handicap | Good | 61.55 | 79.7  | 38.4 | 13.3 | 0.9 | 36.7 | 50.0 | 3.4 |
| 318 | 1100 | Handicap | Good | 63.32 | 67.9  | 30.1 | 35.5 | 0.6 | 34.3 | 9.8  | 3.3 |
| 324 | 1100 | Handicap | Good | 62.26 | 94.9  | 30.7 | 40.6 | 0.5 | 30.0 | 2.7  | 3.1 |
| 325 | 1100 | Handicap | Good | 62.02 | 94.9  | 30.7 | 40.6 | 0.5 | 30.0 | 2.7  | 3.1 |
| 326 | 1100 | Handicap | Good | 60.34 | 105.4 | 32.2 | 36.7 | 0.5 | 28.8 | 1.5  | 2.9 |
| 327 | 1100 | Handicap | Good | 60.12 | 105.4 | 32.2 | 36.7 | 0.5 | 28.8 | 1.5  | 2.9 |
| 328 | 1100 | Handicap | Good | 60.48 | 105.3 | 32.0 | 29.0 | 0.6 | 29.3 | 1.3  | 2.9 |
| 452 | 1100 | Handicap | Good | 61.48 | 125.8 | 48.9 | 8.2  | 1.1 | 79.7 | 70.1 | 2.5 |
| 453 | 1100 | Handicap | Good | 61.16 | 125.8 | 48.9 | 8.2  | 1.1 | 79.7 | 70.1 | 2.5 |
| 454 | 1100 | Handicap | Good | 63.06 | 113.3 | 40.8 | 8.1  | 0.9 | 70.3 | 42.1 | 2.3 |
| 455 | 1100 | Handicap | Good | 62.04 | 113.3 | 40.8 | 8.1  | 0.9 | 70.3 | 42.1 | 2.3 |
| 456 | 1100 | Handicap | Good | 61.88 | 107.0 | 35.8 | 7.2  | 0.8 | 62.2 | 29.8 | 2.3 |
| 457 | 1100 | Handicap | Good | 62.46 | 107.0 | 35.8 | 7.2  | 0.8 | 62.2 | 29.8 | 2.3 |
| 458 | 1100 | Handicap | Good | 61.24 | 107.0 | 35.8 | 7.2  | 0.8 | 62.2 | 29.8 | 2.3 |
| 459 | 1100 | Handicap | Good | 62.05 | 108.7 | 34.1 | 5.8  | 0.8 | 54.9 | 24.3 | 2.4 |

|     |      |          |      |       |       |      |      |     |      |       |     |
|-----|------|----------|------|-------|-------|------|------|-----|------|-------|-----|
| 460 | 1100 | Handicap | Good | 62.43 | 108.7 | 34.1 | 5.8  | 0.8 | 54.9 | 24.3  | 2.4 |
| 461 | 1100 | Handicap | Good | 62.12 | 121.3 | 34.7 | 4.1  | 0.8 | 48.4 | 29.2  | 2.7 |
| 462 | 1100 | Handicap | Good | 61.33 | 121.3 | 34.7 | 4.1  | 0.8 | 48.4 | 29.2  | 2.7 |
| 463 | 1100 | Handicap | Good | 61.06 | 163.7 | 68.0 | 4.2  | 1.8 | 68.7 | 186.5 | 5.4 |
| 471 | 1100 | Handicap | Good | 63.93 | 133.5 | 51.3 | 15.1 | 0.9 | 70.8 | 45.9  | 4.7 |
| 473 | 1100 | Handicap | Good | 61.74 | 130.0 | 46.8 | 15.2 | 0.7 | 65.9 | 30.1  | 4.8 |
| 474 | 1100 | Handicap | Good | 61.56 | 130.0 | 46.8 | 15.2 | 0.7 | 65.9 | 30.1  | 4.8 |
| 475 | 1100 | Handicap | Good | 62.09 | 130.0 | 46.8 | 15.2 | 0.7 | 65.9 | 30.1  | 4.8 |
| 477 | 1100 | Handicap | Good | 62.76 | 123.8 | 40.4 | 14.1 | 0.6 | 58.9 | 20.4  | 4.8 |
| 478 | 1100 | Handicap | Good | 62.67 | 113.2 | 33.8 | 11.1 | 0.6 | 53.2 | 19.5  | 4.8 |
| 479 | 1100 | Handicap | Good | 62.61 | 113.2 | 33.8 | 11.1 | 0.6 | 53.2 | 19.5  | 4.8 |
| 480 | 1100 | Handicap | Good | 62.95 | 110.7 | 30.2 | 7.5  | 0.6 | 48.8 | 21.2  | 4.6 |
| 481 | 1100 | Handicap | Good | 63.36 | 110.7 | 30.2 | 7.5  | 0.6 | 48.8 | 21.2  | 4.6 |
| 492 | 1100 | Handicap | Good | 64.13 | 98.6  | 28.4 | 17.7 | 0.4 | 43.7 | 17.5  | 3.2 |
| 493 | 1100 | Handicap | Good | 62.13 | 98.6  | 28.4 | 17.7 | 0.4 | 43.7 | 17.5  | 3.2 |
| 494 | 1100 | Handicap | Good | 62.55 | 98.6  | 28.4 | 17.7 | 0.4 | 43.7 | 17.5  | 3.2 |
| 495 | 1100 | Handicap | Good | 62.31 | 100.0 | 27.8 | 16.9 | 0.3 | 40.0 | 9.0   | 2.9 |
| 496 | 1100 | Handicap | Good | 62.70 | 100.0 | 27.8 | 16.9 | 0.3 | 40.0 | 9.0   | 2.9 |
| 497 | 1100 | Handicap | Good | 62.62 | 101.9 | 28.5 | 14.6 | 0.2 | 38.0 | 5.6   | 2.6 |
| 498 | 1100 | Handicap | Good | 63.01 | 101.9 | 28.5 | 14.6 | 0.2 | 38.0 | 5.6   | 2.6 |
| 499 | 1100 | Handicap | Good | 62.61 | 100.9 | 30.6 | 11.3 | 0.2 | 38.5 | 4.7   | 2.5 |
| 500 | 1100 | Handicap | Good | 63.28 | 100.9 | 30.6 | 11.3 | 0.2 | 38.5 | 4.7   | 2.5 |
| 519 | 1100 | Handicap | Good | 60.56 | 64.4  | 23.0 | 5.8  | 0.7 | 25.0 | 67.0  | 2.7 |
| 521 | 1100 | Handicap | Good | 63.55 | 64.6  | 19.8 | 7.7  | 0.6 | 27.1 | 55.6  | 2.8 |
| 530 | 1100 | Handicap | Good | 60.76 | 49.1  | 8.8  | 11.8 | 0.3 | 29.9 | 16.1  | 2.5 |
| 531 | 1100 | Handicap | Good | 62.88 | 54.8  | 8.9  | 9.9  | 0.4 | 30.6 | 18.0  | 2.5 |
| 532 | 1100 | Handicap | Good | 61.27 | 54.8  | 8.9  | 9.9  | 0.4 | 30.6 | 18.0  | 2.5 |
| 533 | 1100 | Handicap | Good | 61.19 | 55.9  | 11.5 | 8.0  | 0.4 | 30.4 | 19.8  | 2.3 |



|     |      |          |      |       |      |      |      |     |      |      |     |
|-----|------|----------|------|-------|------|------|------|-----|------|------|-----|
| 534 | 1100 | Handicap | Good | 62.47 | 55.9 | 11.5 | 8.0  | 0.4 | 30.4 | 19.8 | 2.3 |
| 535 | 1100 | Handicap | Good | 61.92 | 55.9 | 11.5 | 8.0  | 0.4 | 30.4 | 19.8 | 2.3 |
| 536 | 1100 | Handicap | Good | 62.17 | 58.6 | 14.3 | 6.0  | 0.5 | 30.3 | 27.3 | 2.2 |
| 555 | 1100 | Handicap | Good | 61.82 | 66.3 | 25.5 | 7.1  | 0.9 | 26.9 | 87.4 | 2.9 |
| 558 | 1100 | Handicap | Good | 63.82 | 44.1 | 14.0 | 12.4 | 0.5 | 21.3 | 37.8 | 1.9 |
| 568 | 1100 | Handicap | Good | 62.13 | 27.8 | 5.9  | 13.1 | 0.3 | 18.2 | 5.6  | 1.0 |
| 569 | 1100 | Handicap | Good | 61.48 | 27.8 | 5.9  | 13.1 | 0.3 | 18.2 | 5.6  | 1.0 |
| 570 | 1100 | Handicap | Good | 62.86 | 35.3 | 7.6  | 10.5 | 0.3 | 20.9 | 10.6 | 1.1 |
| 572 | 1100 | Handicap | Good | 62.18 | 48.3 | 10.5 | 7.8  | 0.4 | 23.1 | 20.4 | 1.3 |
| 573 | 1100 | Handicap | Good | 62.74 | 48.3 | 10.5 | 7.8  | 0.4 | 23.1 | 20.4 | 1.3 |
| 574 | 1100 | Handicap | Good | 62.11 | 74.9 | 38.7 | 10.5 | 1.1 | 29.2 | 57.8 | 2.4 |
| 585 | 1100 | Handicap | Good | 61.51 | 50.4 | 18.1 | 32.4 | 0.5 | 16.4 | 5.6  | 1.5 |
| 586 | 1100 | Handicap | Good | 62.42 | 49.0 | 14.7 | 33.8 | 0.4 | 11.8 | 2.6  | 1.6 |
| 587 | 1100 | Handicap | Good | 63.14 | 49.0 | 14.7 | 33.8 | 0.4 | 11.8 | 2.6  | 1.6 |
| 588 | 1100 | Handicap | Good | 61.66 | 46.4 | 13.6 | 32.1 | 0.4 | 10.1 | 1.3  | 1.6 |
| 589 | 1100 | Handicap | Good | 62.98 | 46.4 | 13.6 | 32.1 | 0.4 | 10.1 | 1.3  | 1.6 |
| 590 | 1100 | Handicap | Good | 63.45 | 46.4 | 13.6 | 32.1 | 0.4 | 10.1 | 1.3  | 1.6 |
| 591 | 1100 | Handicap | Good | 62.75 | 47.4 | 15.4 | 27.8 | 0.4 | 11.1 | 1.0  | 1.7 |
| 592 | 1100 | Handicap | Good | 63.11 | 47.4 | 15.4 | 27.8 | 0.4 | 11.1 | 1.0  | 1.7 |
| 12  | 1200 | Handicap | Good | 63.31 | 76.9 | 20.6 | 44.8 | 0.2 | 6.4  | 1.0  | 2.8 |
| 60  | 1200 | Handicap | Good | 62.87 | 66.1 | 16.3 | 27.3 | 0.2 | 7.9  | 3.0  | 2.0 |
| 73  | 1200 | Handicap | Good | 61.85 | 74.8 | 23.9 | 20.7 | 0.4 | 13.1 | 9.5  | 2.0 |
| 79  | 1200 | Handicap | Good | 61.36 | 82.6 | 20.1 | 32.4 | 0.2 | 8.8  | 2.3  | 2.0 |
| 80  | 1200 | Handicap | Good | 63.41 | 82.6 | 20.1 | 32.4 | 0.2 | 8.8  | 2.3  | 2.0 |
| 82  | 1200 | Handicap | Good | 62.85 | 81.8 | 20.2 | 33.8 | 0.2 | 7.7  | 1.5  | 2.0 |
| 84  | 1200 | Handicap | Good | 62.56 | 79.8 | 19.0 | 34.5 | 0.2 | 7.4  | 1.3  | 2.0 |
| 87  | 1200 | Handicap | Good | 61.74 | 78.8 | 20.8 | 34.7 | 0.2 | 7.8  | 1.2  | 2.1 |
| 88  | 1200 | Handicap | Good | 61.88 | 74.7 | 21.3 | 33.5 | 0.2 | 8.3  | 1.2  | 2.1 |

|     |      |          |      |       |       |      |      |     |      |       |     |
|-----|------|----------|------|-------|-------|------|------|-----|------|-------|-----|
| 89  | 1200 | Handicap | Good | 62.01 | 74.7  | 21.3 | 33.5 | 0.2 | 8.3  | 1.2   | 2.1 |
| 90  | 1200 | Handicap | Good | 62.61 | 67.5  | 19.8 | 30.9 | 0.3 | 8.9  | 1.1   | 2.1 |
| 118 | 1200 | Handicap | Good | 63.10 | 55.4  | 11.5 | 37.0 | 0.2 | 6.5  | 1.3   | 2.1 |
| 137 | 1200 | Handicap | Good | 62.96 | 91.2  | 16.2 | 46.7 | 0.2 | 7.6  | 1.2   | 2.3 |
| 142 | 1200 | Handicap | Good | 62.29 | 114.2 | 20.2 | 38.1 | 0.2 | 6.4  | 1.0   | 2.0 |
| 145 | 1200 | Handicap | Good | 62.65 | 119.3 | 24.4 | 35.9 | 0.2 | 7.2  | 1.0   | 2.0 |
| 188 | 1200 | Handicap | Good | 62.59 | 56.7  | 21.1 | 35.7 | 0.2 | 10.0 | 3.5   | 1.4 |
| 199 | 1200 | Handicap | Good | 62.45 | 48.9  | 16.3 | 23.7 | 0.2 | 7.3  | 1.2   | 1.6 |
| 200 | 1200 | Handicap | Good | 63.15 | 48.9  | 16.3 | 23.7 | 0.2 | 7.3  | 1.2   | 1.6 |
| 215 | 1200 | Handicap | Good | 62.55 | 93.6  | 20.0 | 31.7 | 0.3 | 8.7  | 1.0   | 2.0 |
| 218 | 1200 | Handicap | Good | 62.00 | 86.5  | 19.9 | 28.9 | 0.3 | 8.9  | 1.0   | 2.0 |
| 246 | 1200 | Handicap | Good | 62.99 | 124.3 | 45.9 | 39.3 | 0.9 | 76.1 | 20.8  | 5.8 |
| 247 | 1200 | Handicap | Good | 62.43 | 127.9 | 44.0 | 41.5 | 0.8 | 69.9 | 13.2  | 5.3 |
| 251 | 1200 | Handicap | Good | 61.56 | 152.3 | 40.2 | 34.9 | 0.7 | 57.7 | 6.7   | 4.7 |
| 302 | 1200 | Handicap | Good | 62.79 | 86.5  | 27.1 | 15.5 | 0.5 | 46.5 | 33.3  | 3.3 |
| 303 | 1200 | Handicap | Good | 61.90 | 83.8  | 23.0 | 15.8 | 0.4 | 41.7 | 18.6  | 3.1 |
| 310 | 1200 | Handicap | Good | 61.79 | 120.8 | 27.2 | 8.6  | 0.5 | 38.6 | 19.2  | 3.1 |
| 337 | 1200 | Handicap | Good | 61.81 | 151.0 | 58.3 |      | 0.5 | 28.8 | 75.6  | 8.0 |
| 341 | 1200 | Handicap | Good | 61.70 | 156.6 | 63.6 |      | 0.8 | 30.5 | 93.0  | 8.6 |
| 468 | 1200 | Handicap | Good | 63.05 | 158.2 | 65.7 | 10.7 | 1.5 | 77.0 | 129.2 | 4.8 |
| 476 | 1200 | Handicap | Good | 62.14 | 123.8 | 40.4 | 14.1 | 0.6 | 58.9 | 20.4  | 4.8 |
| 564 | 1200 | Handicap | Good | 62.74 | 22.0  | 4.7  | 16.6 | 0.2 | 14.0 | 4.6   | 1.0 |
| 566 | 1200 | Handicap | Good | 62.10 | 23.9  | 4.9  | 15.5 | 0.2 | 15.4 | 4.4   | 1.0 |

---

**Table S4.** Dataset of “Conditional” races.

| Number | Distance | Type of race      | Track Condition | Speed | PM10  | PM2.5 | O3   | CO  | NO2  | NO    | SO2 |
|--------|----------|-------------------|-----------------|-------|-------|-------|------|-----|------|-------|-----|
| 7      | 1000     | Conditional F2L   | Good            | 61.27 | 73.1  | 22.4  | 44.3 | 0.2 | 6.8  | 1.1   | 2.3 |
| 259    | 1000     | Conditional F2L   | Good            | 61.38 | 67.3  | 24.3  | 8.9  | 0.8 | 35.3 | 35.1  | 4.0 |
| 260    | 1000     | Conditional F2L   | Good            | 61.05 | 67.3  | 24.3  | 8.9  | 0.8 | 35.3 | 35.1  | 4.0 |
| 312    | 1000     | Conditional F2L   | Good            | 61.04 | 80.1  | 37.2  | 19.4 | 0.8 | 38.7 | 35.6  | 3.5 |
| 314    | 1000     | Conditional F2L   | Good            | 61.92 | 73.8  | 34.3  | 27.7 | 0.7 | 37.7 | 17.0  | 3.4 |
| 315    | 1000     | Conditional F2L   | Good            | 61.39 | 73.8  | 34.3  | 27.7 | 0.7 | 37.7 | 17.0  | 3.4 |
| 206    | 1000     | Conditional F3W   | Good            | 64.67 | 91.9  | 22.6  | 33.7 | 0.3 | 8.0  | 1.4   | 1.9 |
| 470    | 1000     | Conditional F3W   | Good            | 63.42 | 146.8 | 59.4  | 13.1 | 1.2 | 75.9 | 83.2  | 4.8 |
| 148    | 1000     | Conditional M-F3W | Good            | 61.43 | 104.9 | 36.0  | 40.3 | 0.7 | 37.9 | 34.5  | 3.4 |
| 83     | 1000     | Conditional M-FW  | Good            | 63.77 | 79.8  | 19.0  | 34.5 | 0.2 | 7.4  | 1.3   | 2.0 |
| 19     | 1000     | Conditional M2L   | Good            | 64.68 | 46.9  | 12.3  | 31.2 | 0.3 | 6.7  | 1.9   | 1.7 |
| 22     | 1000     | Conditional M2L   | Good            | 63.85 | 55.0  | 12.3  | 33.5 | 0.3 | 6.3  | 1.5   | 1.7 |
| 257    | 1000     | Conditional M2L   | Good            | 60.98 | 66.5  | 25.3  | 7.3  | 0.9 | 33.0 | 47.1  | 4.1 |
| 264    | 1000     | Conditional M2L   | Good            | 61.83 | 75.8  | 27.3  | 12.0 | 0.7 | 41.6 | 19.8  | 3.9 |
| 317    | 1000     | Conditional M2L   | Good            | 61.62 | 67.9  | 30.1  | 35.5 | 0.6 | 34.3 | 9.8   | 3.3 |
| 136    | 1000     | Conditional M3    | Good            | 63.21 | 91.2  | 16.2  | 46.7 | 0.2 | 7.6  | 1.2   | 2.3 |
| 450    | 1000     | Conditional M3W   | Good            | 61.10 | 136.2 | 55.8  | 7.5  | 1.4 | 83.8 | 105.4 | 3.1 |
| 42     | 1100     | Conditional F2L   | Good            | 63.47 | 94.0  | 23.1  | 46.3 | 0.3 | 9.8  | 1.6   | 1.8 |
| 45     | 1100     | Conditional F2L   | Good            | 63.56 | 99.2  | 23.9  | 47.8 | 0.3 | 9.0  | 1.2   | 1.8 |
| 95     | 1100     | Conditional F2L   | Good            | 60.77 | 86.9  | 18.3  | 37.4 | 0.3 | 13.0 | 4.1   | 3.0 |
| 98     | 1100     | Conditional F2L   | Good            | 61.55 | 82.8  | 16.9  | 40.7 | 0.3 | 10.3 | 2.3   | 2.9 |
| 149    | 1100     | Conditional F2L   | Good            | 61.03 | 89.3  | 30.8  | 48.5 | 0.5 | 26.8 | 13.0  | 3.2 |
| 152    | 1100     | Conditional F2L   | Good            | 60.94 | 84.6  | 26.3  | 54.4 | 0.3 | 15.5 | 3.1   | 3.0 |
| 520    | 1100     | Conditional F2L   | Good            | 61.45 | 64.6  | 19.8  | 7.7  | 0.6 | 27.1 | 55.6  | 2.8 |
| 523    | 1100     | Conditional F2L   | Good            | 61.96 | 49.4  | 12.2  | 9.8  | 0.5 | 28.2 | 34.7  | 2.4 |

|     |      |                  |      |       |       |      |      |     |      |      |     |
|-----|------|------------------|------|-------|-------|------|------|-----|------|------|-----|
| 59  | 1100 | Conditional F3W  | Good | 63.08 | 66.1  | 16.3 | 27.3 | 0.2 | 7.9  | 3.0  | 2.0 |
| 2   | 1100 | Conditional F3L  | Good | 62.99 | 84.0  | 28.5 | 34.1 | 0.3 | 15.4 | 11.1 | 2.4 |
| 21  | 1100 | Conditional F3L  | Good | 62.58 | 55.0  | 12.3 | 33.5 | 0.3 | 6.3  | 1.5  | 1.7 |
| 46  | 1100 | Conditional F3L  | Good | 62.38 | 104.4 | 24.3 | 47.0 | 0.3 | 8.3  | 1.1  | 1.9 |
| 64  | 1100 | Conditional F3L  | Good | 62.54 | 64.7  | 15.8 | 31.7 | 0.2 | 5.8  | 1.2  | 2.0 |
| 86  | 1100 | Conditional F3L  | Good | 61.68 | 78.8  | 20.8 | 34.7 | 0.2 | 7.8  | 1.2  | 2.1 |
| 92  | 1100 | Conditional F3L  | Good | 63.22 | 92.0  | 20.8 | 31.6 | 0.4 | 16.5 | 9.3  | 3.1 |
| 111 | 1100 | Conditional F3L  | Good | 62.77 | 60.6  | 16.3 | 27.7 | 0.3 | 13.5 | 10.9 | 2.1 |
| 129 | 1100 | Conditional F3L  | Good | 61.94 | 82.3  | 21.6 | 35.4 | 0.5 | 28.4 | 20.9 | 3.0 |
| 159 | 1100 | Conditional F3L  | Good | 61.31 | 92.6  | 13.5 | 48.4 | 0.3 | 7.9  | 1.0  | 3.0 |
| 165 | 1100 | Conditional F3L  | Good | 61.92 | 71.8  | 20.9 | 30.9 | 0.2 | 12.0 | 5.2  | 2.5 |
| 187 | 1100 | Conditional F3L  | Good | 63.11 | 60.5  | 22.3 | 35.7 | 0.3 | 10.9 | 4.0  | 1.4 |
| 210 | 1100 | Conditional F3L  | Good | 60.59 | 89.1  | 20.0 | 35.9 | 0.3 | 7.6  | 1.3  | 2.0 |
| 283 | 1100 | Conditional F3L  | Good | 61.41 | 121.5 | 45.8 |      | 0.7 | 52.4 | 38.3 | 4.0 |
| 321 | 1100 | Conditional F3L  | Good | 62.05 | 84.3  | 29.7 | 42.6 | 0.5 | 30.4 | 3.9  | 3.2 |
| 336 | 1100 | Conditional F3L  | Good | 61.04 | 141.1 | 52.5 |      | 0.4 | 27.4 | 67.4 | 7.7 |
| 488 | 1100 | Conditional F3L  | Good | 62.94 | 106.8 | 35.9 | 14.4 | 0.8 | 56.6 | 71.2 | 4.2 |
| 491 | 1100 | Conditional F3L  | Good | 62.86 | 101.3 | 31.3 | 17.2 | 0.5 | 48.5 | 34.1 | 3.6 |
| 116 | 1100 | Conditional F3W  | Good | 63.79 | 53.4  | 12.3 | 36.5 | 0.2 | 8.1  | 2.0  | 2.1 |
| 248 | 1100 | Conditional M-FL | Good | 62.16 | 127.9 | 44.0 | 41.5 | 0.8 | 69.9 | 13.2 | 5.3 |
| 131 | 1100 | Conditional M2L  | Good | 61.26 | 83.5  | 19.8 | 41.1 | 0.4 | 21.2 | 10.5 | 2.8 |
| 134 | 1100 | Conditional M2L  | Good | 63.05 | 85.8  | 16.9 | 45.6 | 0.3 | 12.0 | 3.0  | 2.5 |
| 522 | 1100 | Conditional M2L  | Good | 61.40 | 49.4  | 12.2 | 9.8  | 0.5 | 28.2 | 34.7 | 2.4 |
| 524 | 1100 | Conditional M2L  | Good | 61.83 | 46.6  | 8.4  | 11.6 | 0.4 | 28.6 | 26.8 | 2.0 |
| 6   | 1100 | Conditional M3L  | Good | 62.67 | 77.2  | 24.4 | 40.4 | 0.3 | 9.8  | 3.3  | 2.3 |
| 25  | 1100 | Conditional M3L  | Good | 62.20 | 64.8  | 12.1 | 34.8 | 0.3 | 6.0  | 1.3  | 1.8 |
| 37  | 1100 | Conditional M3L  | Good | 62.62 | 87.6  | 23.5 | 38.0 | 0.3 | 14.7 | 5.8  | 1.9 |
| 56  | 1100 | Conditional M3L  | Good | 62.51 | 65.7  | 16.3 | 22.9 | 0.2 | 8.9  | 4.5  | 2.0 |

|     |      |                 |      |       |       |      |      |     |      |       |     |
|-----|------|-----------------|------|-------|-------|------|------|-----|------|-------|-----|
| 58  | 1100 | Conditional M3L | Good | 62.71 | 66.1  | 16.3 | 27.3 | 0.2 | 7.9  | 3.0   | 2.0 |
| 74  | 1100 | Conditional M3L | Good | 62.20 | 79.0  | 22.7 | 25.4 | 0.3 | 11.3 | 5.8   | 2.0 |
| 78  | 1100 | Conditional M3L | Good | 61.40 | 80.8  | 21.6 | 29.5 | 0.3 | 10.0 | 3.5   | 2.0 |
| 85  | 1100 | Conditional M3L | Good | 61.07 | 78.8  | 20.8 | 34.7 | 0.2 | 7.8  | 1.2   | 2.1 |
| 102 | 1100 | Conditional M3L | Good | 61.99 | 81.8  | 15.8 | 39.8 | 0.2 | 6.7  | 1.0   | 2.6 |
| 113 | 1100 | Conditional M3L | Good | 62.38 | 56.0  | 13.8 | 32.5 | 0.3 | 10.6 | 4.9   | 2.1 |
| 114 | 1100 | Conditional M3L | Good | 62.41 | 56.0  | 13.8 | 32.5 | 0.3 | 10.6 | 4.9   | 2.1 |
| 135 | 1100 | Conditional M3L | Good | 60.92 | 85.8  | 16.9 | 45.6 | 0.3 | 12.0 | 3.0   | 2.5 |
| 147 | 1100 | Conditional M3L | Good | 60.72 | 104.9 | 36.0 | 40.3 | 0.7 | 37.9 | 34.5  | 3.4 |
| 183 | 1100 | Conditional M3L | Good | 62.20 | 61.6  | 24.6 | 28.7 | 0.4 | 15.1 | 15.1  | 1.6 |
| 205 | 1100 | Conditional M3L | Good | 62.15 | 92.4  | 26.8 | 28.9 | 0.4 | 20.8 | 16.8  | 1.9 |
| 282 | 1100 | Conditional M3L | Good | 61.62 | 121.5 | 45.8 |      | 0.7 | 52.4 | 38.3  | 4.0 |
| 338 | 1100 | Conditional M3L | Good | 62.29 | 151.0 | 58.3 |      | 0.5 | 28.8 | 75.6  | 8.0 |
| 483 | 1100 | Conditional M3L | Good | 61.49 | 162.4 | 47.4 | 6.8  | 1.4 | 65.9 | 155.9 | 5.2 |
| 486 | 1100 | Conditional M3L | Good | 61.26 | 117.3 | 41.0 | 10.7 | 1.1 | 63.6 | 116.6 | 4.8 |
| 3   | 1100 | Conditional M3W | Good | 63.10 | 84.0  | 28.5 | 34.1 | 0.3 | 15.4 | 11.1  | 2.4 |
| 484 | 1100 | Conditional F3L | Good | 62.89 | 162.4 | 47.4 | 6.8  | 1.4 | 65.9 | 155.9 | 5.2 |
| 13  | 1100 | Conditional F3W | Good | 64.04 | 80.0  | 20.3 | 42.5 | 0.2 | 6.9  | 1.0   | 2.8 |
| 39  | 1100 | Conditional M3L | Good | 62.67 | 90.9  | 23.3 | 43.6 | 0.3 | 12.2 | 2.8   | 1.8 |
| 445 | 1200 | Conditional F3L | Good | 61.64 | 167.9 | 67.5 | 4.3  | 2.0 | 78.7 | 200.0 | 4.6 |
| 186 | 1200 | Conditional F2L | Good | 61.85 | 60.5  | 22.3 | 35.7 | 0.3 | 10.9 | 4.0   | 1.4 |
| 275 | 1200 | Conditional F2L | Good | 62.31 | 136.3 | 51.6 |      | 1.2 | 54.7 | 88.3  | 4.6 |
| 330 | 1200 | Conditional F2L | Good | 61.85 | 116.6 | 44.5 |      | 0.2 | 23.8 | 45.4  | 6.8 |
| 334 | 1200 | Conditional F2L | Good | 62.04 | 126.6 | 47.8 |      | 0.3 | 25.5 | 54.5  | 7.2 |
| 240 | 1200 | Conditional F2W | Good | 62.18 | 148.0 | 57.2 | 21.5 | 1.5 | 90.9 | 97.4  | 7.0 |
| 261 | 1200 | Conditional F2W | Good | 63.78 | 70.0  | 24.9 | 10.9 | 0.7 | 37.2 | 25.0  | 3.9 |
| 189 | 1200 | Conditional F2L | Good | 61.65 | 56.7  | 21.1 | 35.7 | 0.2 | 10.0 | 3.5   | 1.4 |
| 28  | 1200 | Conditional F3W | Good | 63.23 | 95.4  | 11.8 | 32.6 | 0.3 | 5.4  | 1.1   | 1.9 |

|     |      |                 |      |       |       |      |      |     |      |       |     |
|-----|------|-----------------|------|-------|-------|------|------|-----|------|-------|-----|
| 77  | 1200 | Conditional F3W | Good | 62.74 | 80.8  | 21.6 | 29.5 | 0.3 | 10.0 | 3.5   | 2.0 |
| 451 | 1200 | Conditional F3L | Good | 62.53 | 136.2 | 55.8 | 7.5  | 1.4 | 83.8 | 105.4 | 3.1 |
| 166 | 1200 | Conditional M2L | Good | 62.79 | 71.8  | 20.9 | 30.9 | 0.2 | 12.0 | 5.2   | 2.5 |
| 167 | 1200 | Conditional M2L | Good | 62.61 | 72.6  | 19.4 | 35.6 | 0.2 | 9.1  | 2.6   | 2.4 |
| 202 | 1200 | Conditional M2L | Good | 62.61 | 93.8  | 29.8 | 23.4 | 0.5 | 23.9 | 26.6  | 1.9 |
| 204 | 1200 | Conditional M2L | Good | 62.45 | 92.4  | 26.8 | 28.9 | 0.4 | 20.8 | 16.8  | 1.9 |
| 238 | 1200 | Conditional M2L | Good | 62.19 | 163.3 | 61.0 | 13.6 | 1.9 | 90.7 | 147.4 | 7.6 |
| 241 | 1200 | Conditional M2L | Good | 62.12 | 148.0 | 57.2 | 21.5 | 1.5 | 90.9 | 97.4  | 7.0 |
| 294 | 1200 | Conditional M2L | Good | 63.42 | 114.3 | 45.8 | 7.4  | 1.4 | 56.9 | 155.2 | 4.9 |
| 296 | 1200 | Conditional M2L | Good | 61.69 | 96.5  | 37.1 | 10.3 | 1.1 | 55.1 | 110.3 | 4.3 |
| 40  | 1200 | Conditional M3W | Good | 63.32 | 90.9  | 23.3 | 43.6 | 0.3 | 12.2 | 2.8   | 1.8 |
| 464 | 1200 | Conditional M3L | Good | 62.39 | 170.4 | 70.1 | 7.1  | 1.8 | 75.3 | 168.1 | 5.2 |
| 467 | 1200 | Conditional M3L | Good | 63.77 | 158.2 | 65.7 | 10.7 | 1.5 | 77.0 | 129.2 | 4.8 |
| 278 | 1200 | Conditional F2L | Good | 61.90 | 136.3 | 51.2 |      | 1.1 | 56.7 | 71.3  | 4.5 |

The code for the different types of “Conditional” races is read as follows: first there is the gender (M=male/F=female), age and previous sports results (L=losers, W=winners).
